# Supplementary material for: Pharmacological Basis of Rumex hastatus D. Don in Gastrointestinal Diseases with Focusing Effects on H+/K+-ATPase, Calcium Channels Inhibition and PDE Mediated Signaling: Toxicological Evaluation on Vital Organs
Source: MDPI journal article supplement (doi:10.3390/molecules27185919), 2022-09-12
Supplement: s1 [file s1]

**Table S1.** Table presenting molecular mechanics Poisson Boltzmann surface area and molecular mechanics Generalized Born surface area (MMPBSA-MMGBSA) values of rutin-H<sup>+</sup>/K<sup>+</sup>-ATPase.

| MMGBSA          | Average Values | Std. Dev |
|-----------------|----------------|----------|
| VDWAALS         | -61.9027       | 3.1507   |
| EEL             | -28.9140       | 8.5848   |
| EGB             | 47.3976        | 7.0177   |
| ESURF           | -6.9506        | 0.2889   |
| $\Delta G$ gas  | -90.8166       | 8.9731   |
| $\Delta G$ solv | 40.4470        | 7.0278   |
| $\Delta$ TOTAL  | -50.3696       | 4.4032   |
| MMPBSA          | Average Values | Std. Dev |
| VDWAALS         | -61.9027       | 3.1507   |
| EEL             | -28.9140       | 8.5848   |
| EPB             | 58.4900        | 6.6887   |
| ENPOLAR         | -4.5037        | 0.1797   |
| $\Delta G$ gas  | -90.8166       | 8.9731   |
| $\Delta G$ solv | 53.9863        | 6.6765   |
| $\Delta$ TOTAL  | -36.8304       | 4.9028   |

VDWAALS: van der waals  
electrostatic interaction

EEL:

EPB/EGB: the electrostatic

contribution to the solvation free energy calculated by PB and GB respectively.

ESURF: non-polar contribution to solvation energy using SASA (solvent accessible surface area) for GB.

ENPOLAR: non-polar contribution to solvation energy from repulsive solute-solvent interactions for PB.

Delta G gas: change in energy in gaseous phase.

Delta G solv: change in energy in solvation phase.

**Table S2.** Table presenting molecular mechanics Poisson Boltzmann surface area and molecular mechanics Generalized Born surface area (MMPBSA-MMGBSA) values of rutin-voltage gated L-type calcium channel. VDWAAALS: van der waals  
EEL: electrostatic interaction

| MMGBSA                   | Average values | Std.Dev  |
|--------------------------|----------------|----------|
| VDWAALS                  | -55.6448       | 4.0571   |
| EEL                      | -22.6093       | 8.1912   |
| EGB                      | 34.7234        | 7.9352   |
| ESURF                    | -6.3886        | 0.2655   |
| $\Delta G_{\text{gas}}$  | -78.2542       | 9.1786   |
| $\Delta G_{\text{solv}}$ | 28.3348        | 7.8232   |
| $\Delta \text{ TOTAL}$   | -49.9194       | 3.9229   |
| MMPBSA                   | Average Values | Std. Dev |
| VDWAALS                  | -55.6448       | 4.0571   |
| EEL                      | -22.6093       | 8.1912   |
| EPB                      | 45.0120        | 8.3928   |
| ENPOLAR                  | -4.3173        | 0.1342   |
| $\Delta G_{\text{gas}}$  | -78.2542       | 9.1786   |
| $\Delta G_{\text{solv}}$ | 40.6947        | 8.3160   |
| $\Delta \text{ TOTAL}$   | -37.5595       | 3.4529   |

EPB/EGB: the electrostatic contribution to the solvation free energy calculated by PB and GB respectively.  
ESURF: non-polar contribution to solvation energy using SASA (solvent accessible surface area) for GB.  
ENPOLAR: non-polar contribution to solvation energy from repulsive solute-solvent interactions for PB.  
Delta G gas: change in energy in gaseous phase.  
Delta G solv: change in energy in solvation phase.
